# Supplementary material
Source: PubMed Central journal article supplement (PMC2814352)
Supplement: neo1202_0139SD1.pdf [file neo1202_0139SD1.pdf]

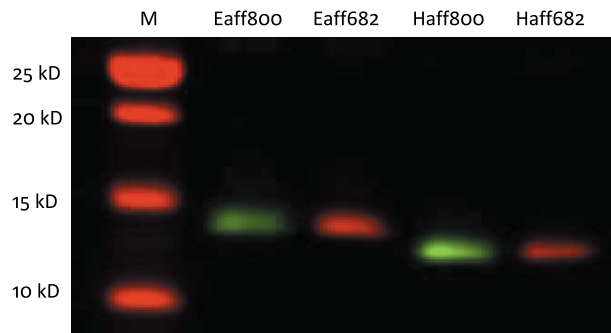

**Figure W1.** Gel image of Affibody molecules labeled with IR-Dye800CW or DY-682. Labeled Affibody molecules were purified by passing reaction mixture through a Zeba Spin Desalting Column. Purified samples (0.2 pmol each) were separated on a Bis-Tris gel.

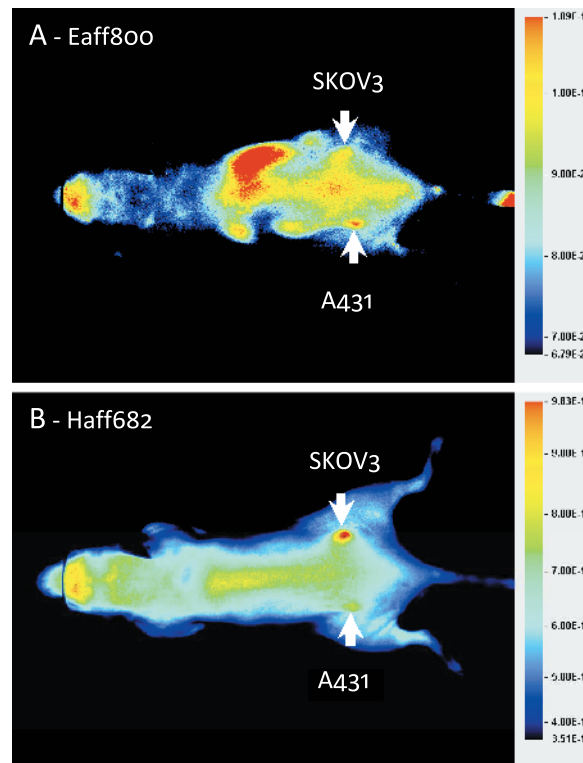

**Figure W2.** Pseudocolored images of mouse with Eaff800 signal (A) or Haff682 signal (B). Note that S2A and S2B were pseudocolored images of Figure 6, A-a and A-b, respectively. See Figure 6 for details of experiment.

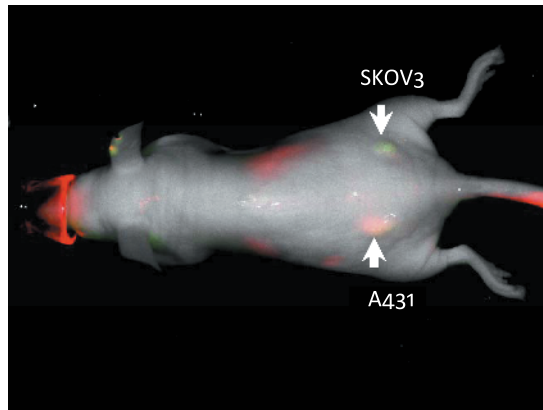

**Figure W3.** Two-color *in vivo* optical imaging with Eaff682 and Haff800. Nude mice bearing A431 and SKOV3 tumors on the left and right sides, respectively, were injected with 100  $\mu$ l of PBS containing 0.5 nmol of Eaff682 and 0.5 nmol of Haff800. Whole body images (dorsal view) were acquired 1 day after agent injection. Green and red represent IRDye800CW and DY-682 fluorescence signals, respectively. The tumors are indicated with arrows.

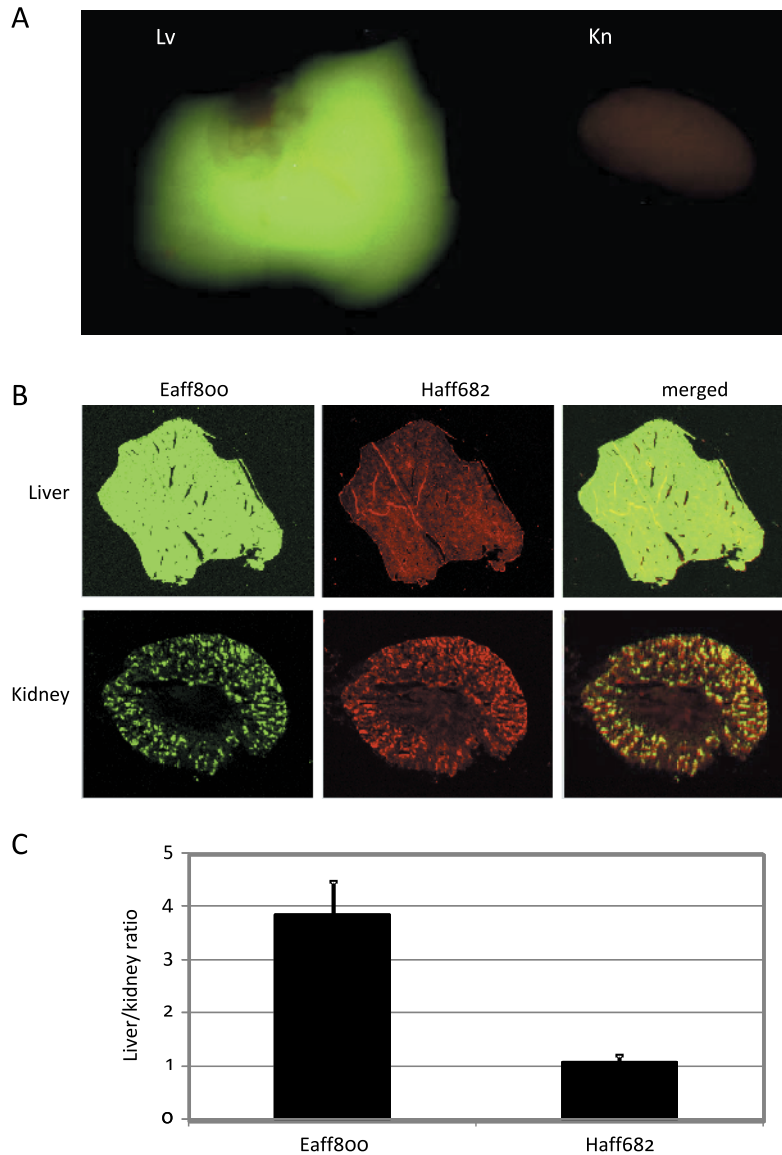

**Figure W4.** Accumulation of Eaff800 and Haff682 in mouse liver and kidney. (A) Images of the liver and kidney. Mice were killed 1 day after imaging agent injection. The organs were collected and rinsed in PBS before imaging. Green and red represent IRDye800CW and DY-682 fluorescence signals, respectively. *Kn* indicates kidney; *Lv*, liver. (B) Sections of mouse liver and kidney. The organs were snap-frozen in OCT compound and sectioned at 8- $\mu$ m thickness. (C) Liver-to-kidney ratio of Eaff800 and Haff682 signal intensities. Average signal intensities were calculated using ROIs with the same sizes from different tissue sections. Liver-to-kidney ratio was calculated by dividing liver signal intensity by kidney signal intensity.

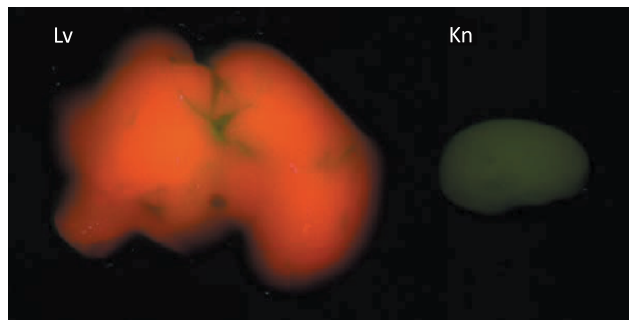

**Figure W5.** Accumulation of Eaff682 and Haff800 in mouse liver and kidney. Mice were killed 1 day after imaging agent injection. The liver and kidney were collected and rinsed in PBS before imaging. Green and red represent IRDye800CW and DY-682 fluorescence signals, respectively. Note the predominant Eaff682 signal in the liver. *Kn* indicates kidney; *Lv*, liver.
